# Supplementary material for: BRANCHLESS TRICHOMESlinks cell shape and cell cycle control inArabidopsistrichomes
Source: Oxford University Press journal article supplement (doi:10.1242/dev.058982), 2011-05-10
Supplement: dev058982tables1.pdf [file dev058982tables1.pdf]

**Table S1. Nuclear size of developing wild-type and *b/t* mutant trichome and pavement cell nuclei**

| Genotype     | Cell type            | Cross-sectional area ( $\mu\text{m}^2$ )* | Estimated volume ( $\mu\text{m}^3$ )† |
|--------------|----------------------|-------------------------------------------|---------------------------------------|
| Col-0        | Developing trichome  | 45.8±10.3 (12)                            | 233.0                                 |
| <i>b/t-3</i> | Developing trichome  | 44.5±12.0 (10)                            | 223.3                                 |
| Col-0        | Developing protoderm | 15.0±2.2 (8)                              | 43.7                                  |
| <i>b/t-3</i> | Developing protoderm | 14.8±2.6 (11)                             | 42.8                                  |

Cross-sectional areas of DAPI-stained developing trichome and pavement cell nuclei were determined using images captured and analyzed using Slidebook software (Intelligent Imaging Innovations, Denver, CO, USA). Based on a Kruskal-Wallis one-way ANOVA on ranks and an all pairwise multiple comparison test (Dunn's test), all pairwise comparisons differ significantly ( $P < 0.05$ ), except Col-0 developing trichome nuclear size versus *b/t-3* nuclear size and Col-0 developing protoderm nuclear size versus *b/t-3* nuclear size.

\*Mean±s.d. (n).

†Volume estimated from cross-sectional area assuming that the nuclei are spherical.
